# Supplementary material for: The novel choline kinase inhibitor ICL-CCIC-0019 reprograms cellular metabolism and inhibits cancer cell growth
Source: Oncotarget. 2016 May 19;7(24):37103–20. doi: 10.18632/oncotarget.9466 (PMC5095062; doi:10.18632/oncotarget.9466)
Supplement: Supplementary file 1 [file oncotarget-07-37103-s001.pdf]

# The novel choline kinase inhibitor ICL-CCIC-0019 reprograms cellular metabolism and inhibits cancer cell growth

## Supplementary Materials

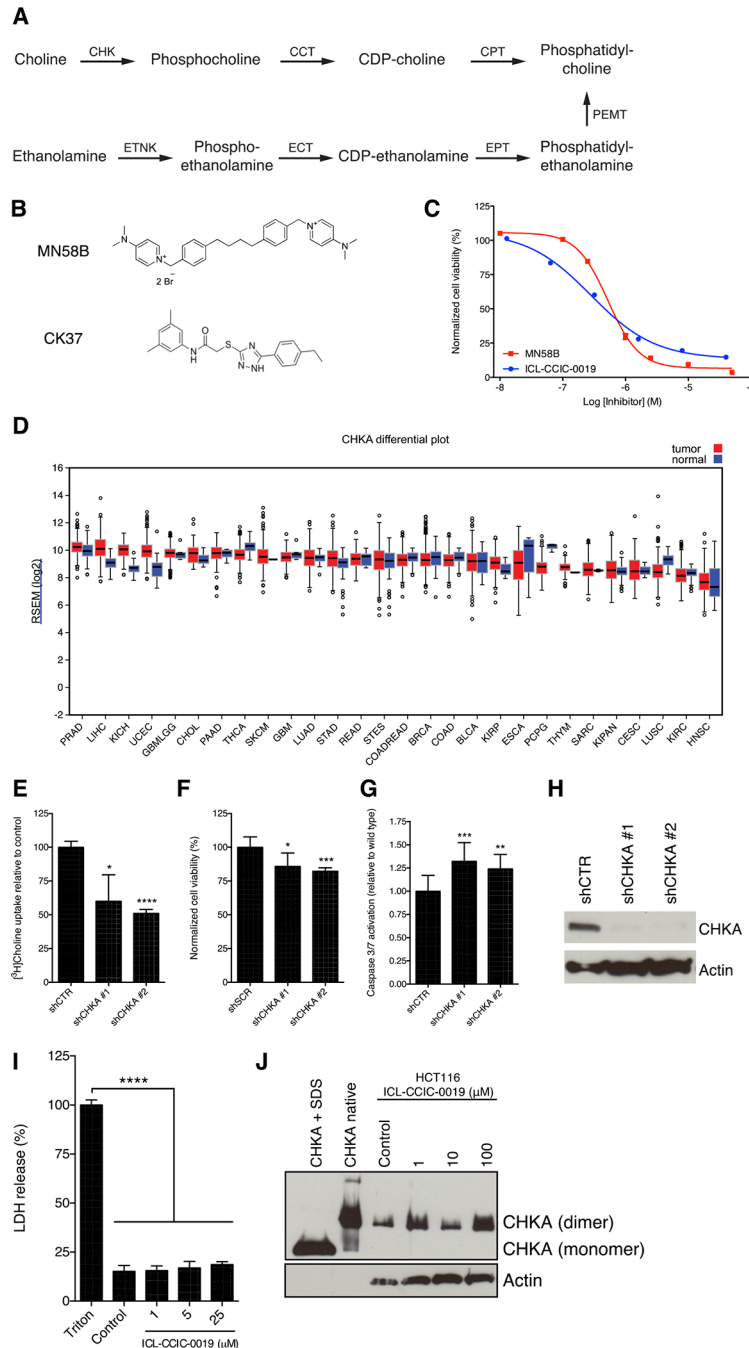

**Supplementary Figure S1:** (A) CDP-choline and ethanolamine kinase pathways of phosphatidylcholine (PC) and phosphatidylethanolamine (PE) synthesis. CHK, choline kinase alpha or beta; CCT, CTP:phosphocholine cytidyltransferase; CPT, CDP-choline:1, 2-diacylglycerol cholinephosphotransferase; ETNK, ethanolamine kinase 1 or 2; ECT, CTP:phosphoethanolamine cytidyltransferase; EPT, Ethanolamine phosphotransferase; PEMT, Phosphatidyl ethanolamine methyltransferase. (B) Structures of MN58B and CK37. (C) Comparative antiproliferative activities of ICL-CCIC-0019 and MN58B in A549 cells.  $[^3\text{H}]$  choline uptake (D),

CHKA mRNA expression in tumor vs. normal tissue across various cancer types (data: TCGA, analyzed via firebrowse.org). BLCA, Bladder urothelial carcinoma; BRCA, Breast invasive carcinoma; CESC, Cervical and endocervical cancers; CHOL, Cholangiocarcinoma; COAD, Colon adenocarcinoma; COADREAD, Colorectal adenocarcinoma; ESCA, Esophageal carcinoma; GBM, Glioblastoma multiforme; GBMLGG, Glioma; HNSC, Head and Neck squamous cell carcinoma; KICH, Kidney Chromophobe; KIPAN, Pan-kidney cohort (KICH+KIRC+KIRP); KIRC, Kidney renal clear cell carcinoma; KIRP, Kidney renal papillary cell carcinoma; LIHC, Liver hepatocellular carcinoma; LUAD, Lung adenocarcinoma; LUSC, Lung squamous cell carcinoma; PAAD, Pancreatic adenocarcinoma; PCPG, Pheochromocytoma and Paraganglioma; PRAD, Prostate adenocarcinoma; READ, Rectum adenocarcinoma; SARC, Sarcoma; SKCM, Skin Cutaneous Melanoma; STAD, Stomach adenocarcinoma; STES, Stomach and Esophageal carcinoma; THCA, Thyroid carcinoma; THYM, Thymoma; UCEC, Uterine Corpus Endometrial Carcinoma. (E) Cell viability (F), caspase 3/7 activity (G) and western blot against CHKA (H) upon 5 day treatment with doxycycline to induce CHKA shRNA in HCT116 cells. E-G, mean of  $n = 3 \pm \text{SD}$ ;  $*P \leq 0.05$ ,  $**P \leq 0.01$ ,  $***P \leq 0.001$ ,  $****P \leq 0.0001$ . (I) Cell membrane integrity analysis measuring LDH release to the supernatant in HCT116 cells upon treatment with indicated doses of inhibitor for 4 h; mean of  $n = 3 \pm \text{SD}$ ;  $****P \leq 0.0001$ . (J) Maintenance of CHKA dimer integrity in HCT116 cells was determined by BN-PAGE upon treatment with indicated concentrations for 24 hours.

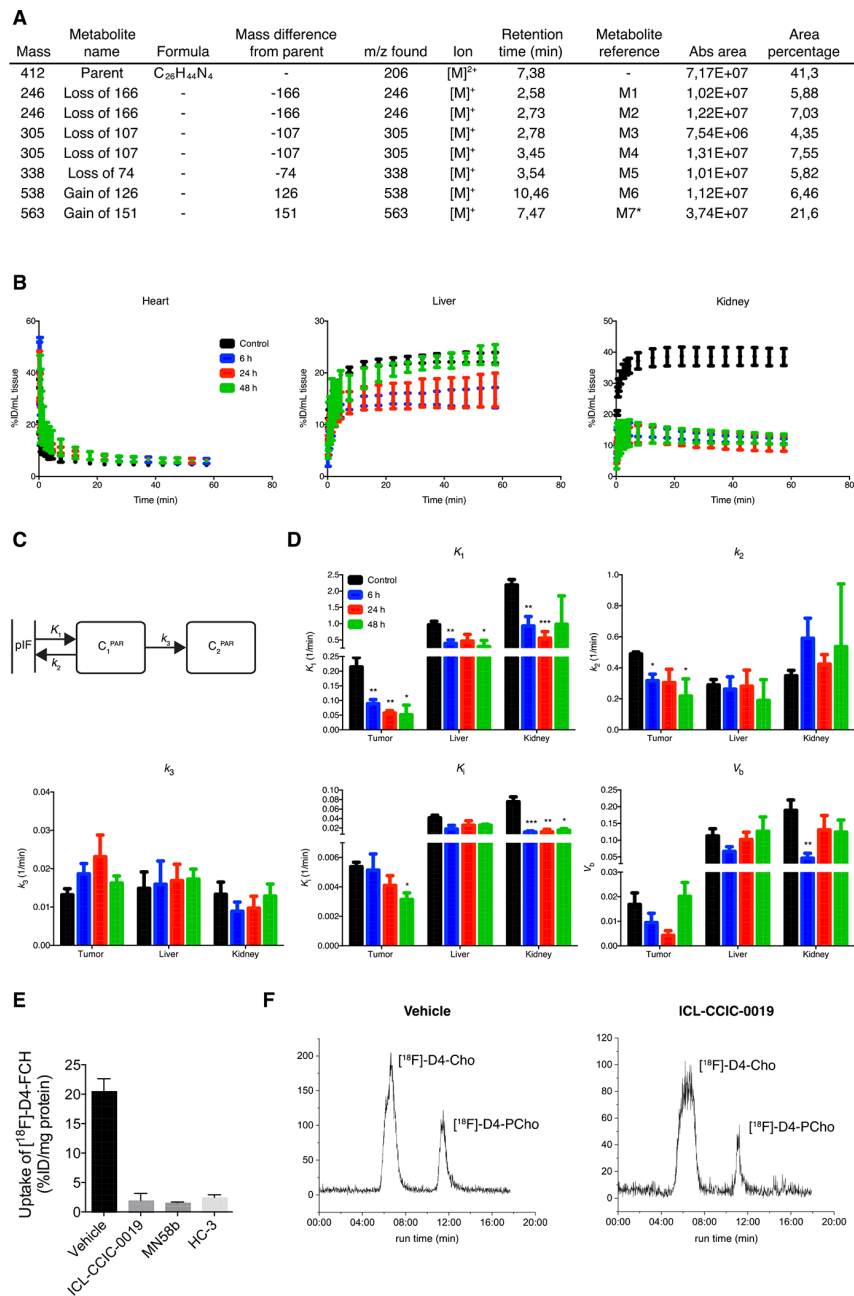

**Supplementary Figure S2:** (A) Plasma samples of BALB/c mice treated with 10  $\mu\text{M}$  ICL-CCIC-0019 for 2 h used for tissue PK experiments were pooled and analyzed for parent peak and metabolites by LC-MS. (B) heart, liver and kidney TACs of  $[\text{18F}]$ -D4-FCH PET scans. (C) Scheme of two-tissue irreversible compartmental model. (D) Pharmacokinetic modeling of competitive inhibition of CHKA by ICL-CCIC-0019 using  $[\text{18F}]$  D4-FCH in HCT116 xenograft-bearing mice. Data represent mean of  $n = 4-5$  per group  $\pm \text{SEM}$ ;

\* $P \leq 0.05$ , \*\* $P \leq 0.01$ , \*\*\* $P \leq 0.001$ . (E) Competition assay based on the transport and phosphorylation of [ $^{18}\text{F}$ ]-D4-FCH in the absence (vehicle; saline) or presence of choline kinase inhibitors (ICL-CCIC-0019 or MN58b) or choline transport inhibitor (Hemicholinium, HC-3) at 10  $\mu\text{M}$ . HCT-116 cells were placed in Na-free buffer, and the buffer was replaced with one containing [ $^{18}\text{F}$ ]-D4-FCH and inhibitor for 10 min. Data are mean  $\pm$  SD,  $n = 6$ . (F) Radio-HPLC analysis of cells similarly treated with vehicle or 10  $\mu\text{M}$  ICL-CCIC-0019 for 10 min. Note only parent [ $^{18}\text{F}$ ]-D4-FCH and phosphocholine metabolite [ $^{18}\text{F}$ ]-D4-PCh were identified on chromatograms; a betaine metabolite was not formed.

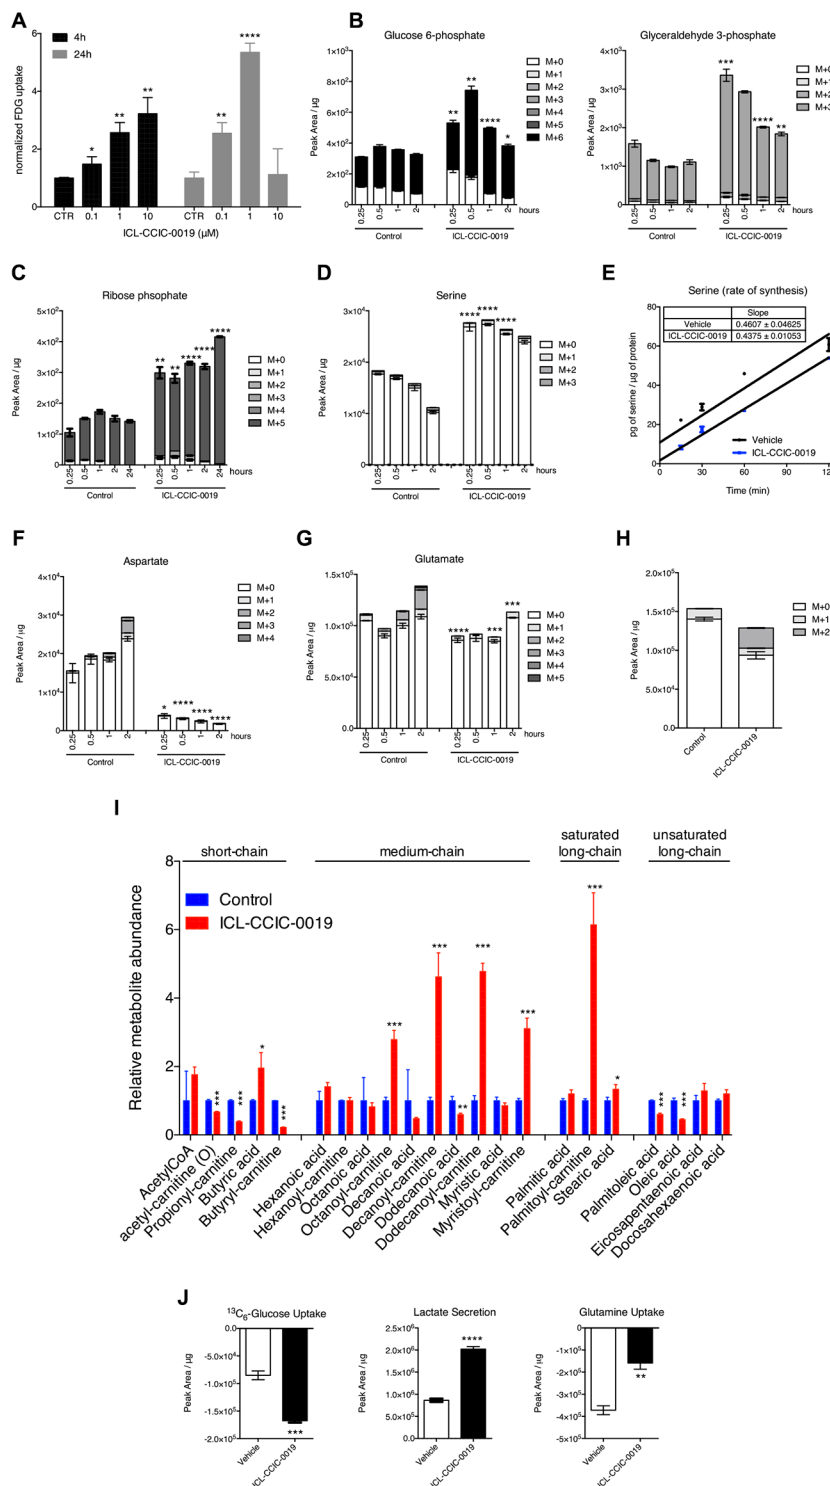

**Supplementary Figure S3:** (A) [ $^{18}\text{F}$ ]-FDG uptake upon ICL-CCIC-0019 treatment in HCT116 cells. B-D, HCT116 cells were treated with ICL-CCIC-0019 for 24 h and subsequently subjected to  $^{13}\text{C}$ -labeled glucose for indicated times. Intracellular glucose-6-phosphate, glyceraldehyde-3-phosphate (B), ribose phosphate (C), serine (D), rate of serine synthesis (E), aspartate (F) and glutamate (G) are shown. (H) Acetyl-carnitine from  $^{13}\text{C}_2$ -labeled acetate after 24 h of treatment with ICL-CCIC-0019. (I) Steady-state metabolomic changes in fatty acid components upon 24-hour ICL-CCIC-0019 treatment. (J) Transmembrane flux of glucose, lactate and glutamine. Mean of  $n = 3 \pm \text{SD}$ ; \*  $P \leq 0.05$ ; \*\*  $P \leq 0.01$ , \*\*\* $P \leq 0.001$ , \*\*\*\* $P \leq 0.0001$ .

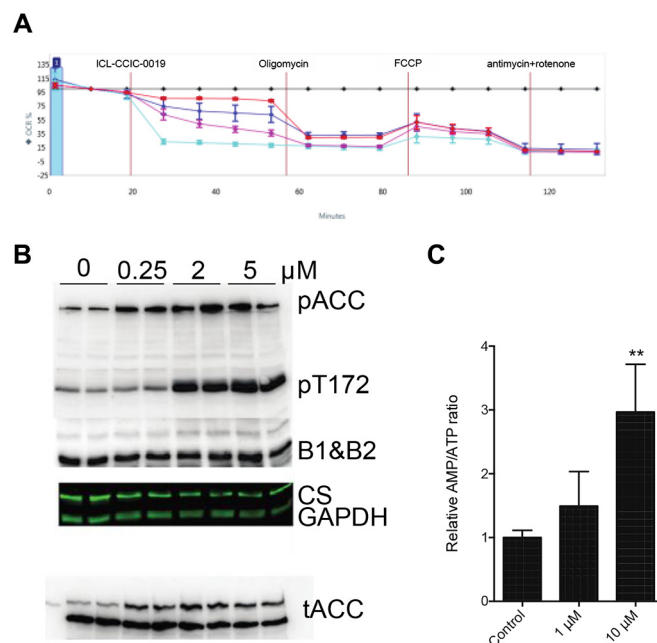

**Supplementary Figure S4:** (A) Effect of CHK inhibitors and AMP kinase activator on OCR. A, background (black), control (red), 10  $\mu$ M AZD991 (blue), 10  $\mu$ M MN58B (magenta), 10  $\mu$ M ICL-CCIC-0019 (cyan). (B) Effect of ICL-CCIC-0019 on AMP kinase phosphorylation and citrate synthase as in Figure 6C with total ACC included. (C) relative AMP/ATP ratio as determined by LC-MS. Mean of  $n = 4 \pm$  SD, \*\* $P < 0.01$ .

**Supplementary Table S1: Screen of ICL-CCIC-0019 against a panel of 131 recombinant kinases**

| Kinase         | Species | Accession no.         | % activity remaining | SD |
|----------------|---------|-----------------------|----------------------|----|
| ABL            | human   | NM_005157             | 112                  | 5  |
| AMPK           | rat     | Tissue purified       | 109                  | 11 |
| ASK1           | human   | NM_005923             | 119                  | 5  |
| Aurora A       | human   | BC027464              | 98                   | 1  |
| Aurora B       | human   | NM_004217             | 102                  | 9  |
| BRK            | human   | NM_005975             | 117                  | 10 |
| BRSK1          | human   | NM_032430             | 110                  | 2  |
| BRSK2          | human   | AF533878              | 94                   | 3  |
| BTk            | human   | NP_00052.1            | 131                  | 1  |
| CAMK1          | human   | NM_003656             | 110                  | 11 |
| CAMKKb         | human   | NM_153499             | 91                   | 3  |
| CDK2-Cyclin A  | human   | NM_001798/NM_001237   | 112                  | 30 |
| CDK9-Cyclin T1 | human   | NM_001261/NM_001240.2 | 95                   | 7  |
| CHK1           | human   | AF016582              | 97                   | 4  |
| CHK2           | human   | NM_007194             | 90                   | 2  |
| CK1 $\gamma$ 2 | human   | BC018693.2            | 92                   | 5  |
| CK1 $\delta$   | human   | NM_001893             | 100                  | 5  |
| CK2            | human   | NM_001895             | 86                   | 1  |
| CLK2           | human   | NM_003993.2           | 101                  | 1  |
| CSK            | human   | NM_004383             | 96                   | 1  |
| DAPK1          | human   | NM_004938.2           | 96                   | 13 |
| DDR2           | human   | NM_006182             | 85                   | 13 |
| DYRK1A         | human   | NM_130437.2           | 114                  | 1  |
| DYRK2          | human   | NM_003583             | 96                   | 2  |
| DYRK3          | human   | AY590695              | 106                  | 1  |
| EF2K           | human   | AAH32665              | 99                   | 11 |
| EIF2AK3        | human   | NM_004836.5           | 97                   | 1  |
| EPH-A2         | human   | NM_004431             | 93                   | 12 |
| EPH-A4         | human   | NM_004438             | 124                  | 10 |
| EPH-B1         | human   | NM_004441             | 112                  | 6  |
| EPH-B2         | human   | NM_004442             | 90                   | 1  |
| EPH-B3         | human   | NM_004443             | 107                  | 11 |
| EPH-B4         | human   | NP_004435.3           | 110                  | 5  |
| ERK1           | human   | BC013992              | 91                   | 1  |
| ERK2           | human   | NM_002745             | 103                  | 6  |
| ERK8           | human   | AY065978              | 69                   | 4  |
| FGF-R1         | human   | M34641                | 92                   | 11 |
| GCK            | human   | BC047865              | 89                   | 12 |
| GSK3b          | human   | L33801                | 94                   | 13 |
| HER4           | human   | NM_005235             | 79                   | 7  |
| HIPK1          | human   | NM_198268             | 106                  | 6  |
| HIPK2          | human   | AF326592              | 104                  | 3  |
| HIPK3          | human   | NM_005734             | 112                  | 35 |
| IGF-1R         | human   | NM_000875             | 65                   | 7  |
| IKKb           | human   | XM_032491             | 101                  | 8  |

|           |       |             |     |    |
|-----------|-------|-------------|-----|----|
| IKKe      | human | NM_014002   | 123 | 36 |
| IR        | human | NM_000208.2 | 103 | 16 |
| IRAK1     | human | NM_001569.3 | 89  | 12 |
| IRAK4     | human | BC013316.1  | 83  | 11 |
| IRR       | human | NM_014215   | 92  | 6  |
| JAK2      | human | NP_004963.1 | 90  | 4  |
| JNK1      | human | L26318      | 98  | 21 |
| JNK2      | human | L31951      | 100 | 15 |
| JNK3      | human | NM_002753   | 92  | 2  |
| Lck       | mouse | X03533      | 118 | 29 |
| LKB1      | human | NP_000446   | 100 | 7  |
| MAPKAP-K2 | human | NM_032960   | 89  | 4  |
| MAPKAP-K3 | human | NM_004635   | 67  | 6  |
| MARK1     | human | AF154845    | 103 | 8  |
| MARK2     | human | NM_004954   | 86  | 3  |
| MARK3     | human | U64205      | 106 | 5  |
| MARK4     | human | AK075272    | 95  | 4  |
| MEKK1     | human | XM_042066   | 92  | 1  |
| MELK      | human | NM_014791   | 106 | 14 |
| MINK1     | human | NM_015716   | 100 | 7  |
| MKK1      | human | L05624      | 82  | 0  |
| MKK2      | human | NM_030662   | 95  | 9  |
| MKK6      | human | NM_002758   | 102 | 2  |
| MLK1      | human | NM_005965   | 91  | 2  |
| MLK3      | human | NM_033141   | 110 | 4  |
| MNK1      | human | NM_002419   | 101 | 2  |
| MNK2      | human | AB000409    | 96  | 25 |
| MPSK1     | human | AF237775    | 105 | 5  |
| MSK1      | human | AF074393    | 96  | 2  |
| MST2      | human | CR407675    | 89  | 20 |
| MST3      | human | U60206      | 117 | 9  |
| MST4      | human | AAH65378    | 113 | 4  |
| NEK2a     | human | NM_016542   | 101 | 7  |
| NEK6      | human | NM_002497   | 86  | 6  |
| NUAK1     | human | NM_014397   | 103 | 20 |
| OSR1      | human | NM_014840   | 99  | 3  |
| p38a MAPK | human | NM_005109.2 | 108 | 9  |
| p38b MAPK | human | L35264      | 107 | 3  |
| p38d MAPK | human | Y14440      | 100 | 2  |
| p38g MAPK | human | Y10487      | 99  | 25 |
| PAK2      | human | Y10488      | 107 | 6  |
| PAK4      | human | NM_002577   | 114 | 5  |
| PAK5      | human | O96013      | 90  | 9  |
| PAK6      | human | Q9P286      | 107 | 7  |
| PDK1      | human | Q9NQU5      | 133 | 1  |
| PHK       | human | X80590      | 94  | 6  |
| PIM1      | human | NM_002613   | 102 | 8  |

|              |       |                             |     |    |
|--------------|-------|-----------------------------|-----|----|
| PIM2         | human | NM_002648                   | 103 | 20 |
| PIM3         | human | U77735                      | 113 | 2  |
| PKA          | human | Q86V86                      | 106 | 2  |
| PKBa         | human | NM_002730                   | 101 | 12 |
| PKBb         | human | BC000479                    | 93  | 1  |
| PKCa         | human | NM_001626                   | 98  | 3  |
| PKCz         | human | NM_002742                   | 106 | 10 |
| PKC $\gamma$ | human | NM_002737                   | 93  | 4  |
| PKD1         | human | NM_002739                   | 105 | 5  |
| PLK1         | human | NM_002744                   | 112 | 20 |
| PRAK         | human | NM_005030                   | 101 | 11 |
| PRK2         | human | AF032437                    | 94  | 13 |
| RIPK2        | human | S75548                      | 102 | 0  |
| ROCK 2       | human | NM_003821                   | 97  | 1  |
| RSK1         | rat   | U38481                      | 78  | 6  |
| RSK2         | human | NM_002953.3                 | 105 | 10 |
| S6K1         | human | NM_004586                   | 88  | 1  |
| SGK1         | human | NM_003161                   | 94  | 14 |
| SIK2         | human | NM_005627                   | 109 | 3  |
| SIK3         | human | NM_015191.1                 | 102 | 16 |
| SmMLCK       | human | Sugen Kinase Database 15721 | 104 | 18 |
| Src          | human | NM_005417.3                 | 105 | 1  |
| SRPK1        | human | NM_003137                   | 106 | 3  |
| STK33        | human | BC031231.1                  | 99  | 3  |
| SYK          | human | AAH01645.1                  | 92  | 9  |
| TAK1-TAB1    | human | NM_003188 and NM_006116     | 97  | 2  |
| TAO1         | human | NM_020791                   | 100 | 13 |
| TBK1         | human | NM_013254                   | 108 | 20 |
| TESK1        | human | NM_006285.2                 | 101 | 17 |
| TIE2         | human | BC035514.1                  | 89  | 4  |
| TLK1         | human | NM_012290.4                 | 110 | 20 |
| TrkA         | human | NM_001007792.1              | 84  | 15 |
| TSSK1        | human | AY028964                    | 107 | 5  |
| TTBK1        | human | NM_032538.1                 | 97  | 4  |
| TTK          | human | NM_003318                   | 101 | 5  |
| VEG-FR       | human | NM_002019.3                 | 80  | 6  |
| WNK1         | human | NM_018979.3                 | 102 | 2  |
| YES1         | human | NM_005433                   | 110 | 4  |
| ZAP70        | human | NM_001079                   | 102 | 5  |
